# Supplementary material for: The SahulCHAR collection: a palaeofire database for Australia, New Guinea, and New Zealand
Source: Copernicus journal article supplement (doi:10.5194/essd-17-2681-2025), 2025-06-16

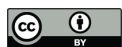

*Supplement of*

## **The SahulCHAR collection: a palaeofire database for Australia, New Guinea, and New Zealand**

**Emma Rehn et al.**

*Correspondence to:* Haidee Cadd ([haidee@uow.edu.au](mailto:haidee@uow.edu.au))

The copyright of individual parts of the supplement might differ from the article licence.

Table S1. Sites included in the SahulCHAR database and their source. Data was obtained through either - original data contributed directly by authors; data contained in paleofire databases (GPD, Neotoma and PANGAEA); original data available in published supplementary materials; and records digitized from published diagrams. CHAR NOTES indicates full source and modifications to database records.

| <b>OBSID</b>                     | <b>CHAR STATUS</b> | <b>CHAR SOURCE</b> | <b>CHAR NOTES</b>                                                       |
|----------------------------------|--------------------|--------------------|-------------------------------------------------------------------------|
| Aguai Ramata_core1_char1         | Unchanged          | paleofire database | Data are from the GPD                                                   |
| Aire Crossing_core1_char1        | Added              | digitized          | Data are from a written source                                          |
| Aire Crossing_core1_char2        | Unchanged          | paleofire database | Data are from the GPD                                                   |
| Ajkwa Estuary core 3_char1       | Unchanged          | paleofire database | Data are from the GPD                                                   |
| Ajkwa Estuary core 4_char1       | Unchanged          | paleofire database | Data are from the GPD                                                   |
| Ajkwa Estuary core 5_char1       | Unchanged          | paleofire database | Data are from the GPD                                                   |
| Allom Lake_core1_char1           | Unchanged          | paleofire database | Data are from the GPD                                                   |
| Allom Lake_core1_char2           | Added              | digitized          | Data are from a written source                                          |
| Allom Lake_core1_char3           | Added              | digitized          | Data are from a written source                                          |
| Anggi Lake_core1_char1           | Unchanged          | paleofire database | Data are from the GPD                                                   |
| Apple Orchard Lagoon_core1_char1 | Modified           | paleofire database | Data are from the GPD, with corrections to depths                       |
| Argan Swamp_core1_char1          | Author             | author             | GPD data NOT USED for this site. Data are author-submitted              |
| Argan Swamp_core1_char2          | Author             | author             | GPD data NOT USED for this site. Data are author-submitted              |
| Argan Swamp_core1_char3          | Author             | author             | GPD data NOT USED for this site. Data are author-submitted              |
| Badu 15_core1_char1              | Author             | author             | GPD data NOT USED for this site. Data are author-submitted              |
| Badu 15_core1_char2              | Author             | author             | GPD data NOT USED for this site. Data are author-submitted              |
| Badu 15_core1_char3              | Author             | author             | GPD data NOT USED for this site. Data are author-submitted              |
| Bar 20_core1_char1               | Author             | author             | GPD data NOT USED for this site. Data are author-submitted              |
| Bar 20_core1_char2               | Author             | author             | GPD data NOT USED for this site. Data are author-submitted              |
| Bar 20_core1_char3               | Author             | author             | GPD data NOT USED for this site. Data are author-submitted              |
| Bega Swamp_core1_char1           | Unchanged          | paleofire database | Data are from the GPD                                                   |
| Big Reedy Lagoon_core1_char1     | Modified           | paleofire database | Data are from the GPD, with corrections to depths                       |
| Big Willum BW01_char1            | Author             | author             | Data are author-submitted                                               |
| Big Willum BW01_char2            | Author             | author             | Data are author-submitted                                               |
| Big Willum BW01_char3            | Author             | author             | Data are author-submitted                                               |
| Big Willum BW03_char1            | Author             | author             | Data are author-submitted                                               |
| Big Willum BW03_char2            | Author             | author             | Data are author-submitted                                               |
| Black Swamp_core1_char1          | Modified           | paleofire database | Data are from the GPD, with corrected values using a missing multiplier |
| Blue Lake Kosciuzko_core1_char1  | Unchanged          | paleofire database | Data are from the GPD                                                   |
| Blundells Flat_core1_char1       | Unchanged          | paleofire database | Data are from the GPD                                                   |

|                                               |           |                    |                                                                              |
|-----------------------------------------------|-----------|--------------------|------------------------------------------------------------------------------|
| Bobundara Swamp pollen core_char1             | Unchanged | paleofire database | Data are from the GPD                                                        |
| Boggy Swamp_core1_char1                       | Modified  | paleofire database | Data are from the GPD, with corrected values using a missing multiplier      |
| Boigu Gawat Swamp 1 core 2_char1              | Author    | author             | GPD data NOT USED for this site. Data are author-submitted                   |
| Boigu Gawat Swamp 1 core 2_char2              | Author    | author             | GPD data NOT USED for this site. Data are author-submitted                   |
| Boigu Gawat Swamp 1 core 2_char3              | Author    | author             | GPD data NOT USED for this site. Data are author-submitted                   |
| Boigu Gawat Swamp 2 core 2_char1              | Author    | author             | GPD data NOT USED for this site. Data are author-submitted                   |
| Boigu Gawat Swamp 2 core 2_char2              | Author    | author             | GPD data NOT USED for this site. Data are author-submitted                   |
| Boigu Gawat Swamp 2 core 2_char3              | Author    | author             | GPD data NOT USED for this site. Data are author-submitted                   |
| Bolin Billabong Core 1 Core 4 composite_char1 | Unchanged | paleofire database | Data are from the GPD                                                        |
| Bondi Lake centre core_char1                  | Added     | digitized          | Data are from a written source                                               |
| Bondi Lake centre core_char2                  | Unchanged | paleofire database | Data are from the GPD                                                        |
| Bondi Lake south core_char1                   | Added     | digitized          | Data are from a written source                                               |
| Bondi Lake south core_char2                   | Unchanged | paleofire database | Data are from the GPD                                                        |
| Boulder Flat_core1_char1                      | Unchanged | paleofire database | Data are from the GPD                                                        |
| Breadalbane SE_core1_char1                    | Unchanged | paleofire database | Data are from the GPD                                                        |
| Bridgewater Lake Core A_char1                 | Added     | digitized          | Data are from a written source                                               |
| Bridgewater Lake Core B_char1                 | Modified  | paleofire database | Data are from the GPD, with a correction to CHARMEASURE                      |
| Bridgewater Lake in situ beach peat_char1     | Added     | digitized          | Data are from a written source                                               |
| Bridgewater Lake not in situ beach peat_char1 | Added     | digitized          | Data are from a written source                                               |
| Brooks Ridge Fen_core1_char1                  | Modified  | paleofire database | Data are from the GPD, with a correction to CHARMEASURE, CHARMAX and CHARMIN |
| Bumpy Lagoon_core1_char1                      | Modified  | paleofire database | Data are from the GPD, with corrections to depths                            |
| Burraga Swamp centre core_char1               | Unchanged | paleofire database | Data are from the GPD                                                        |
| Burraga Swamp edge core_char1                 | Unchanged | paleofire database | Data are from the GPD                                                        |
| Burralow Creek Swamp_core1_char1              | Unchanged | paleofire database | Data are from the GPD                                                        |
| Butchers Swamp_core1_char1                    | Modified  | paleofire database | Data are from the GPD, with corrected values using a missing multiplier      |
| Buxton_core1_char1                            | Unchanged | paleofire database | Data are from the GPD                                                        |
| BWIL2_char1                                   | Author    | author             | GPD data NOT USED for this site. Data are author-submitted                   |
| BWIL2_char2                                   | Author    | author             | Data are author-submitted                                                    |
| BWIL2_char3                                   | Author    | author             | Data are author-submitted                                                    |
| BWIL2_char4                                   | Author    | author             | Data are author-submitted                                                    |
| BWIL2_char5                                   | Author    | author             | Data are author-submitted                                                    |
| Byenup Lagoon Site 1_core1_char1              | Unchanged | paleofire database | Data are from the GPD                                                        |
| Byenup Lagoon Site 2_core1_char1              | Unchanged | paleofire database | Data are from the GPD                                                        |

|                                         |           |                    |                                                                                    |
|-----------------------------------------|-----------|--------------------|------------------------------------------------------------------------------------|
| Caledonia Fen 1997 2001 composite_char1 | Unchanged | paleofire database | Data are from the GPD                                                              |
| Caledonia Fen 1997 2001 composite_char2 | Added     | digitized          | Data are from a written source                                                     |
| Caledonia Fen 2009 core_char1           | Added     | digitized          | Data are from a written source                                                     |
| Caledonia Fen 2009 core_char2           | Added     | digitized          | Data are from a written source                                                     |
| Cameron's Lagoon_core1_char1            | Unchanged | paleofire database | Data are from the GPD                                                              |
| Chapple Vale Swamp composite core_char1 | Modified  | paleofire database | Data are from the GPD, with multiplier applied to remove it from measurement units |
| Club Lake CL4_char1                     | Added     | digitized          | Data are from a written source                                                     |
| Club Lake CL4_char2                     | Added     | digitized          | Data are from a written source                                                     |
| Club Lake western basin_core1_char1     | Added     | digitized          | Data are from a written source                                                     |
| Club Lake western basin_core1_char2     | Unchanged | paleofire database | Data are from the GPD                                                              |
| Cobrico Swamp edge_core1_char1          | Unchanged | paleofire database | Data are from the GPD                                                              |
| Cotter Source Bog Centre Core A_char1   | Unchanged | paleofire database | Data are from the GPD                                                              |
| Cotter Source Bog Margin CSBM_char1     | Unchanged | paleofire database | Data are from the GPD                                                              |
| Crystal Lagoon_core1_char1              |           | paleofire database | Data are from Neotoma                                                              |
| Crystal Lagoon_core1_char2              |           | paleofire database | Data are from Neotoma                                                              |
| Cuddie Springs_core1_char1              | Unchanged | paleofire database | Data are from the GPD                                                              |
| Dalhousie Springs_core1_char1           | Unchanged | paleofire database | Data are from the GPD                                                              |
| Dove Lake_core1_char1                   | Unchanged | paleofire database | Data are from the GPD                                                              |
| DP1_char1                               | Added     | digitized          | Data are from a written source                                                     |
| DP2_char1                               | Added     | digitized          | Data are from a written source                                                     |
| DP3_char1                               | Added     | digitized          | Data are from a written source                                                     |
| DP3_char2                               | Unchanged | paleofire database | Data are from the GPD, with depths converted to metres                             |
| Dublin Bog Core 8_char1                 | Modified  | paleofire database | Data are from the GPD, with corrections to CHARMEASURE and depths                  |
| Egg Lagoon EL10 EL11 composite_char1    | Unchanged | paleofire database | Data are from the GPD                                                              |
| Fred South Swamp_core1_char1            | Added     | digitized          | Data are from a written source                                                     |
| Fred South Swamp_core1_char2            | Unchanged | paleofire database | Data are from the GPD                                                              |
| Gallahers Swamp_core1_char1             | Unchanged | paleofire database | Data are from the GPD                                                              |
| Galway Tarn 0111 0505 composite_char1   | Unchanged | paleofire database | Data are from the GPD                                                              |
| GC-17_char1                             | Unchanged | paleofire database | Data are from the GPD                                                              |
| Gemco LG2_char1                         | Modified  | paleofire database | Data from GPD, with correction to units                                            |
| Gemco LG2_char2                         | Added     | digitized          | Not in GPD                                                                         |
| Ginini Flats_core1_char1                | Unchanged | paleofire database | Data are from the GPD                                                              |
| Gooch's Swamp GCR_char1                 | Unchanged | paleofire database | Data are from the GPD                                                              |

|                                              |           |                    |                                                                |
|----------------------------------------------|-----------|--------------------|----------------------------------------------------------------|
| Gooch's Swamp GCR_char2                      | Added     | digitized          | Not in GPD                                                     |
| Green Lagoon_core1_char1                     | Modified  | paleofire database | Data are from the GPD, with corrections to depths              |
| Greens Bush_core1_char1                      | Unchanged | paleofire database | Data are from the GPD                                          |
| Grey Pole Swamp Broughton Island_core1_char1 | Unchanged | paleofire database | Data are from the GPD                                          |
| Griffith Swamp_core1_char1                   | Unchanged | paleofire database | Data are from the GPD                                          |
| Haeapugua Basin core H6_char1                | Unchanged | paleofire database | Data are from the GPD                                          |
| Haeapugua Basin core H6_char2                | Added     | digitized          | Data are from a written source                                 |
| Henty Bridge_core1_char1                     | Unchanged | paleofire database | Data are from the GPD                                          |
| Hogan's Billabong core a_char1               | Modified  | paleofire database | Data are from the GPD, with THICKNESS added                    |
| Hopwood's Lagoon_core1_char1                 | Unchanged | paleofire database | Data are from the GPD                                          |
| Howes Waterhole Swamp_core1_char1            | Unchanged | paleofire database | Data are from the GPD                                          |
| Ijomba Bog_core1_char1                       | Unchanged | paleofire database | Data are from the GPD                                          |
| Ijomba Bog_core1_char2                       | Added     | digitized          | Data are from a written source                                 |
| Ingar Swamp_core1_char1                      | Unchanged | paleofire database | Data are from the GPD                                          |
| Jibbon Lagoon Core 3_char1                   | Modified  | paleofire database | Data are from the GPD, with corrections to CHARMAX and CHARMIN |
| Kaipo_core1_char1                            | Unchanged | paleofire database | Data are from the GPD                                          |
| Katoomba Swamp Core 1_char1                  | Unchanged | paleofire database | Data are from the GPD                                          |
| Katoomba Swamp Core 2_char1                  | Added     | digitized          | Data are from a written source                                 |
| Kelela Swamp_core1_char1                     | Unchanged | paleofire database | Data are from the GPD                                          |
| Killalea Lagoon centre core_char1            | Unchanged | paleofire database | Data are from the GPD                                          |
| Kings Tableland Swamp_core1_char1            | Unchanged | paleofire database | Data are from the GPD                                          |
| Kings Tableland Swamp_short core_char1       | Unchanged | paleofire database | Data are from the GPD                                          |
| Kings Waterhole_core1_char1                  | Unchanged | paleofire database | Data are from the GPD                                          |
| Kohuora Core A Core B composite_char1        | Modified  | paleofire database | Data are from the GPD, with CHARMIN added                      |
| Kosipe KPA_char1                             | Unchanged | paleofire database | Data are from the GPD                                          |
| Kosipe KPC_char1                             | Unchanged | paleofire database | Data are from the GPD                                          |
| Kosipe KPE_char1                             | Added     | digitized          | Data are from a written source                                 |
| Kurnell Fen Core 1_char1                     | Unchanged | paleofire database | Data are from the GPD                                          |
| Kurnell Fen Core 2                           | Added     | digitized          | Data are from a written source                                 |
| Lake Baraba_core1_char1                      | Modified  | paleofire database | Data from GPD, with depths added from written source           |
| Lake Condah core 1b_char1                    | Added     | digitized          | Data are from a written source                                 |
| Lake Condah_core1_char1                      | Unchanged | paleofire database | Data are from the GPD                                          |

|                                          |           |                    |                                                                                    |
|------------------------------------------|-----------|--------------------|------------------------------------------------------------------------------------|
| Lake Coomboo_core1_char1                 | Unchanged | paleofire database | Data are from the GPD                                                              |
| Lake Couridjah_core1_char1               | Unchanged | paleofire database | Data are from the GPD                                                              |
| Lake Curlip_core1_char1                  | Unchanged | paleofire database | Data are from the GPD                                                              |
| Lake Euramoo_core1_char1                 | Unchanged | paleofire database | Data are from the GPD                                                              |
| Lake Euramoo_core1_char2                 | Added     | digitized          | Data are from a written source                                                     |
| Lake Eyre Core LE 82/2_char1             | Unchanged | paleofire database | Data are from the GPD                                                              |
| Lake Eyre Core LE 82/2_char2             | Added     | digitized          | Data are from a written source                                                     |
| Lake Flannigan King Island Core LF_char1 | Unchanged | paleofire database | Data are from the GPD                                                              |
| Lake Frome Core LF 82/2_char1            | Modified  | paleofire database | Data are from the GPD, with a correction to CHARMEASURE                            |
| Lake Habbema_core1_char1                 | Modified  | paleofire database | Data are from the GPD, with CHARMEASURE added                                      |
| Lake Hordern centre core B_char1         | Added     | digitized          | Data are from a written source                                                     |
| Lake Hordern main core A_char1           | Unchanged | paleofire database | Data are from the GPD                                                              |
| Lake Hordorli_core1_char1                | Unchanged | paleofire database | Data are from the GPD                                                              |
| Lake Johnston Core JA_char1              | Modified  | paleofire database | Data are from the GPD, with multiplier applied to remove it from measurement units |
| Lake Mountain_core1_char1                | Added     | digitized          | GPD data for this site NOT USED due to errors. Data are from a written source      |
| Lake Selina_core1_char1                  | Unchanged | paleofire database | Data are from the GPD                                                              |
| Lake Surprise_core1_char1                | Author    | author             | Data are author-submitted                                                          |
| Lake Surprise_core1_char2                | Modified  | paleofire database | Data are from the GPD, with multiplier applied to remove it from measurement units |
| Lake Tyrrell Site 1_core1_char1          | Unchanged | paleofire database | Data are from the GPD                                                              |
| Lake Tyrrell Site 2_core1_char1          | Unchanged | paleofire database | Data are from the GPD                                                              |
| Lake Wangoom LW87 core_char1             | Unchanged | paleofire database | Data are from the GPD                                                              |
| Lake Wangoom_core1_char1                 | Added     | digitized          | Data are from a written source                                                     |
| Lake Wanum LW II_char1                   | Added     | digitized          | Data are from a written source                                                     |
| Lake Wanum_core1_char1                   | Unchanged | paleofire database | Data are from the GPD                                                              |
| Laravita Tarn_core1_char1                | Modified  | paleofire database | Data are from the GPD, with CHARMIN added                                          |
| Lashmar's Lagoon_core1_char1             | Added     | digitized          | Data are from a written source                                                     |
| LC2_char1                                | Added     | digitized          | Data are from a written source                                                     |
| LC2_char2                                | Added     | digitized          | Data are from a written source                                                     |
| LC2_char3                                | Author    | author             | Data are author-submitted                                                          |
| LL10_char1                               | Added     | digitized          | Data are from a written source                                                     |
| LL10_char2                               | Unchanged | paleofire database | Data are from the GPD                                                              |
| LL15_char1                               | Added     | digitized          | Data are from a written source                                                     |
| LL15_char2                               | Unchanged | paleofire database | Data are from the GPD                                                              |
| Loch Sport Swamp_core1_char1             | Modified  | paleofire database | Data are from the GPD, with multiplier applied to remove it from measurement units |

|                                             |           |                    |                                                                   |
|---------------------------------------------|-----------|--------------------|-------------------------------------------------------------------|
| Long Swamp Core A_char1                     | Unchanged | paleofire database | Data are from the GPD                                             |
| Lower Lake Hogayaku HGL core_char1          | Unchanged | paleofire database | Data are from the GPD                                             |
| Lynchs Crater 2007 composite_char1          | Modified  | paleofire database | Data are from the GPD, with corrections to CHARMETHOD and CHARMIN |
| Lynchs Crater Holocene Core 2_char1         | Added     | digitized          | Data are from a written source                                    |
| Main Lake Tower Hill_core1_char1            | Unchanged | paleofire database | Data are from the GPD                                             |
| Main Lake Tower Hill_core2_char1            | Author    | author             | Data are author-submitted                                         |
| MAR2_char1                                  | Author    | author             | GPD data NOT USED for this site. Data are author-submitted        |
| MAR2_char2                                  | Author    | author             | Data are author-submitted                                         |
| MAR2_char3                                  | Author    | author             | Data are author-submitted                                         |
| MAR2_char4                                  | Author    | author             | Data are author-submitted                                         |
| MAR2_char5                                  | Author    | author             | Data are author-submitted                                         |
| MAR2_char6                                  | Author    | author             | Data are author-submitted                                         |
| Marton Swamp_core1_char1                    | Unchanged | paleofire database | Data are from the GPD                                             |
| McKenzie Road Bog_core1_char1               | Unchanged | paleofire database | Data are from the GPD                                             |
| MD03-2067_char1                             |           | paleofire database | Data are from PANGAEA                                             |
| Micalong Swamp Core MS3_char1               | Unchanged | paleofire database | Data are from the GPD                                             |
| Micalong Swamp Core MS3_char2               | Added     | digitized          | Data are from a written source                                    |
| Middle Patriarch Swamp_core1_char1          | Modified  | paleofire database | Data are from the GPD, with a correction to CHARMEASURE           |
| Mill Creek cores 1, 2, 4 composite_char1    | Unchanged | paleofire database | Data are from the GPD                                             |
| Mountain Lagoon_core1_char1                 | Unchanged | paleofire database | Data are from the GPD                                             |
| MPL12_char1                                 | Author    | author             | Data are author-submitted                                         |
| MPL12_char2                                 | Author    | author             | Data are author-submitted                                         |
| Muellers Rock_core1_char1                   | Unchanged | paleofire database | Data are from the GPD                                             |
| Mulloon_core1_char1                         | Unchanged | paleofire database | Data are from the GPD                                             |
| Native Companion Lagoon NCL1_char1          | Author    | author             | GPD data NOT USED for this site. Data are author-submitted        |
| Neon ANB2_char1                             | Modified  | paleofire database | Data are from the GPD, with CHARMIN added                         |
| Newall Creek_core1_char1                    | Unchanged | paleofire database | Data are from the GPD                                             |
| Newnes Swamp_core1_char1                    | Modified  | paleofire database | Data are from the GPD, with a correction to CHARMEASURE           |
| Noreikora Swamp core NORI/A/18_char1        | Unchanged | paleofire database | Data are from the GPD                                             |
| Noreikora Swamp core NORI/A/18_char2        | Added     | digitized          | Data are from a written source                                    |
| North Torbreck_core1_char1                  | Unchanged | paleofire database | Data are from the GPD                                             |
| Northwest Crater Tower Hill 2008 core_char1 | Added     | digitized          | Not in GPD                                                        |
| Northwest Crater Tower Hill 2008 core_char2 | Added     | digitized          | Not in GPD                                                        |

|                                             |           |                    |                                                                               |
|---------------------------------------------|-----------|--------------------|-------------------------------------------------------------------------------|
| Northwest Crater Tower Hill_core1_char1     | Unchanged | paleofire database | Data are from the GPD                                                         |
| Notts Swamp_core1_char1                     | Unchanged | paleofire database | Data are from the GPD                                                         |
| Nursery Swamp_core1_char1                   | Unchanged | paleofire database | Data are from the GPD                                                         |
| Oaks Creek D-section Missen composite_char1 | Unchanged | paleofire database | Data are from the GPD                                                         |
| ODP 820_char1_1 to ODP 820_char1_82         | Author    | author             | Data from author-submitted spreadsheet                                        |
| ODP 820_char1_83 to ODP 820_char1_111       | Unchanged | paleofire database | Data from GPD, matching author-submitted data                                 |
| ODP 820_char2                               | Unchanged | paleofire database | Data from GPD, matching author-submitted data                                 |
| OKA1 OKA913 composite_char1                 | Modified  | paleofire database | Data are from the GPD, with corrections to CHARMETHOD and CHARMEASURE         |
| Penrith Lakes Drill core_char1              | Modified  | paleofire database | Data are from the GPD, with a correction to CHARMETHOD                        |
| Penrith Lakes Hand core_char1               | Modified  | paleofire database | Data are from the GPD, with a correction to CHARMETHOD                        |
| Penrith Lakes Trench_char1                  | Modified  | paleofire database | Data are from the GPD, with a correction to CHARMETHOD                        |
| Piano Point Lagoon_core1_char1              | Modified  | paleofire database | Data are from the GPD, with corrections to depths                             |
| Pine Camp_core1_char1                       | Modified  | paleofire database | Data are from the GPD, with a correction to CHARMEASURE                       |
| Poets Hill Core 1_char1                     | Unchanged | paleofire database | Data are from the GPD                                                         |
| Poley Creek_core1_char1                     | Unchanged | paleofire database | Data are from the GPD                                                         |
| Powelltown_core1_char1                      | Unchanged | paleofire database | Data are from the GPD                                                         |
| QS-Monolith_char1                           | Unchanged | paleofire database | Data are from the GPD                                                         |
| Quambie Lagoon_core1_char1                  | Modified  | paleofire database | Data are from the GPD, with CHARMAX and CHARMIN corrected                     |
| Quambie Lagoon_core1_char2                  | Modified  | paleofire database | Data are from the GPD, with CHARMAX and CHARMIN corrected                     |
| Quambie Lagoon_core1_char3                  | Modified  | paleofire database | Data are from the GPD, with CHARMAX and CHARMIN corrected                     |
| Queens Swamp Core QS 3_char1                | Unchanged | paleofire database | Data are from the GPD                                                         |
| Redhead Lagoon E12b_char1                   | Added     | author             | GPD data for this site NOT USED due to errors. Data are from a written source |
| Redhead Lagoon E12b_char2                   | Added     | author             | GPD data for this site NOT USED due to errors. Data are from a written source |
| Redhead Lagoon E12b_char3                   | Added     | author             | GPD data for this site NOT USED due to errors. Data are from a written source |
| Redhead Lagoon E12c_char1                   | Added     | author             | GPD data for this site NOT USED due to errors. Data are from a written source |
| Redhead Lagoon F4c_char1                    | Added     | author             | GPD data for this site NOT USED due to errors. Data are from a written source |
| Ringarooma Humus Site 1_core1_char1         | Unchanged | paleofire database | Data are from the GPD                                                         |
| Ringarooma Humus Site 2_core1_char1         | Unchanged | paleofire database | Data are from the GPD                                                         |
| Ringarooma River Site 1_core1_char1         | Unchanged | paleofire database | Data are from the GPD                                                         |
| Ringarooma River Site 2_core1_char1         | Unchanged | paleofire database | Data are from the GPD                                                         |



|                                           |           |                    |                                                                                                    |
|-------------------------------------------|-----------|--------------------|----------------------------------------------------------------------------------------------------|
| RNX-A RNX-B composite_char1               | Modified  | paleofire database | Data are from the GPD, with CHARMEASURE added                                                      |
| Rock Arch Swamp_core1_char1               | Unchanged | paleofire database | Data are from the GPD                                                                              |
| Rotten Swamp 1984 core_char1              | Unchanged | paleofire database | Data are from the GPD                                                                              |
| Rotten Swamp Core 4_char1                 | Unchanged | paleofire database | Data are from the GPD                                                                              |
| Ryans Swamp_core1_char1                   | Unchanged | paleofire database | Data are from the GPD                                                                              |
| SAN1_char1                                | Author    | author             | GPD data NOT USED for this site. Data are author-submitted                                         |
| SAN1_char2                                | Author    | author             | Data are author-submitted                                                                          |
| SAN1_char3                                | Author    | author             | Data are author-submitted                                                                          |
| SAN1_char4                                | Author    | author             | Data are author-submitted                                                                          |
| SAN1_char5                                | Author    | author             | Data are author-submitted                                                                          |
| Sapphire Swamp_core1_char1                | Unchanged | paleofire database | Data are from the GPD                                                                              |
| Snobs Creek_core1_char1                   | Added     | digitized          | GPD data for this site NOT USED due to errors. Data are from a written source                      |
| Snowy Flats_core1_char1                   | Unchanged | paleofire database | Data are from the GPD                                                                              |
| Solomons Jewel Lake_core1_char1           | Unchanged | paleofire database | Data are from the GPD                                                                              |
| Sondambile_core1_char1                    | Unchanged | paleofire database | Data are from the GPD                                                                              |
| South Salvation Creek Swamp_core1_char1   | Modified  | paleofire database | Data are from the GPD, with multiplier applied to remove it from measurement units                 |
| South Salvation Creek Swamp_core1_char2   | Added     | digitized          | Data are from a written source                                                                     |
| Stockyard Swamp Hunter Island_core1_char1 | Unchanged | paleofire database | Data are from the GPD                                                                              |
| Storm Creek_core1_char1                   | Added     | digitized          | Not in GPD                                                                                         |
| Storm Creek_core1_char2                   | Unchanged | paleofire database | Data from GPD                                                                                      |
| Sundown Swamp_core1_char1                 | Modified  | paleofire database | Data are from the GPD, with CHARMIN added                                                          |
| Supulah Hill North Pond 1991 core_char1   | Modified  | paleofire database | Data are from the GPD, with corrections to CHARMEASURE                                             |
| Tadpole Swamp_core1_char1                 | Modified  | paleofire database | Data are from the GPD, with corrected values using a missing multiplier and a correction to depths |
| Talita Kupai core 1_char1                 | Author    | author             | GPD data NOT USED for this site. Data are author-submitted                                         |
| Talita Kupai core 1_char2                 | Author    | author             | GPD data NOT USED for this site. Data are author-submitted                                         |
| Talita Kupai core 1_char3                 | Author    | author             | GPD data NOT USED for this site. Data are author-submitted                                         |
| Talita Kupai core 2_char1                 | Author    | author             | GPD data NOT USED for this site. Data are author-submitted                                         |
| TAS1102_char1                             | Modified  | paleofire database | Data are from the GPD, with corrections to depths and CHARMEASURE                                  |
| TAS1104_char1 to TAS1104_char1_44         | Modified  | paleofire database | Data are from the GPD, with corrections to depth and CHARMEASURE                                   |
| TAS1104_char1_44 to TAS1104_char1_329     | Author    | author             | Data are author-submitted                                                                          |
| TAS1106_char1                             | Modified  | paleofire database | Data are from the GPD, with corrections to depths and CHARMEASURE                                  |
| TAS1107_char1                             | Modified  | paleofire database | Data are from the GPD, with corrections to depths and CHARMEASURE                                  |

|                                       |           |                    |                                                                                    |
|---------------------------------------|-----------|--------------------|------------------------------------------------------------------------------------|
| TAS1108 SC LCA composite_char1        | Unchanged | paleofire database | Data are from the GPD, with corrections to depths and CHARMEASURE                  |
| TAS1108 SC LCA composite_char2        | Added     | digitized          | Data are from a written source                                                     |
| TAS1110_char1                         | Modified  | paleofire database | Data are from the GPD, with corrections to depths and CHARMEASURE                  |
| TAS1203_char1                         | Modified  | paleofire database | Data are from the GPD, with corrections to depths and CHARMEASURE                  |
| TAS1205_char1                         | Modified  | paleofire database | Data are from the GPD, with corrections to depths and CHARMEASURE                  |
| TAS1207_char1                         | Modified  | paleofire database | Data are from the GPD, with corrections to depths and CHARMEASURE                  |
| TAS1401 SC1 N1 composite_char1        |           | paleofire database | Data are from Neotoma, corrected for sample volume                                 |
| TAS1401 SC1 N1 composite_char2        |           | paleofire database | Data are from Neotoma, corrected for sample volume                                 |
| TAS1402_char1                         | Modified  | paleofire database | Data are from the GPD, with a correction to depths                                 |
| TAS1501_char1                         | Modified  | paleofire database | Data are from the GPD, with corrections to depths and CHARMEASURE                  |
| TAS1503_char1                         | Modified  | paleofire database | Data are from the GPD, with corrections to depths and CHARMEASURE                  |
| TAS1504_char1                         | Modified  | paleofire database | Data are from the GPD, with corrections to depths and CHARMEASURE                  |
| TAS1507 SC2_char1                     | Modified  | paleofire database | Data are from the GPD, with a correction to depths                                 |
| TAS1508N1_char1                       | Unchanged | paleofire database | Data are from the GPD, with corrections to depths                                  |
| TAS1508N1_char2                       | Added     | digitized          | Data are from a written source                                                     |
| Tea Tree Swamp Core DRA_char1         | Modified  | paleofire database | Data are from the GPD, with multiplier applied to remove it from measurement units |
| Tea Tree Swamp Core DRE_char1         | Modified  | paleofire database | Data are from the GPD, with multiplier applied to remove it from measurement units |
| Tea Tree Swamp Core DRN-A_char1       | Modified  | paleofire database | Data are from the GPD, with multiplier applied to remove it from measurement units |
| Tiam Point_core1_char1                | Author    | author             | GPD data NOT USED for this site. Data are author-submitted                         |
| Tiam Point_core1_char2                | Author    | author             | GPD data NOT USED for this site. Data are author-submitted                         |
| Tiam Point_core1_char3                | Author    | author             | GPD data NOT USED for this site. Data are author-submitted                         |
| Tiger Snake Swamp_core1_char1         | Added     | digitized          | GPD data for this site NOT USED due to errors. Data are from a written source      |
| Tipoeka Estuary core 1_char1          | Modified  | paleofire database | Data are from the GPD, with name corrected to Tipoeka instead of Ajkwa             |
| Tipoeka Estuary core 2_char1          | Modified  | paleofire database | Data are from the GPD, with name corrected to Tipoeka instead of Ajkwa             |
| Tobacco Lagoon_core1_char1            | Modified  | paleofire database | Data are from the GPD, with corrections to depths                                  |
| Tom Burns D-section Core TBD_char1    | Added     | digitized          | Not in GPD                                                                         |
| Tom Burns D-section Core TBD_char2    | Unchanged | paleofire database | Data from GPD                                                                      |
| Tom Burns Missen Core TBM_char1       | Added     | digitized          | Not in GPD                                                                         |
| Tom Burns Missen Core TBM_char2       | Unchanged | paleofire database | Data from GPD                                                                      |
| Tom Gregory Swamp_core1               | Unchanged | paleofire database | Data are from the GPD                                                              |
| truwana East Coast Lagoon_core1_char1 | Modified  | paleofire database | Data are from the GPD, with corrections to depths                                  |

|                                 |           |                    |                                                                                    |
|---------------------------------|-----------|--------------------|------------------------------------------------------------------------------------|
| Tugupugua Basin core T1_char1   | Unchanged | paleofire database | Data are from the GPD                                                              |
| Tugupugua Basin core T1_char2   | Added     | digitized          | Data are from a written source                                                     |
| Tyrendarra Swamp_core1_char1    | Added     | digitized          | Data are from a written source and the GPD                                         |
| Tyrendarra Swamp_core1_char2    | Unchanged | paleofire database | Data are from the GPD                                                              |
| Waikaremoana core W1_char1      | Unchanged | paleofire database | Data are from the GPD                                                              |
| Wangil Core Site_core1_char1    | Unchanged | paleofire database | Data are from the GPD                                                              |
| Warrananga_core1_char1          | Unchanged | paleofire database | Data are from the GPD                                                              |
| Warrimoo Oval Swamp_core1_char1 | Unchanged | paleofire database | Data are from the GPD                                                              |
| Waruid core 1_char1             | Author    | author             | GPD data NOT USED for this site. Data are author-submitted                         |
| Waruid core 2_char1             | Author    | author             | GPD data NOT USED for this site. Data are author-submitted                         |
| Waruid core 2_char2             | Author    | author             | GPD data NOT USED for this site. Data are author-submitted                         |
| Waruid core 2_char3             | Author    | author             | GPD data NOT USED for this site. Data are author-submitted                         |
| Wet Lagoon_core1_char1          | Unchanged | paleofire database | Data are from the GPD                                                              |
| Whitehaven Swamp_core1_char1    | Modified  | paleofire database | Data are from the GPD, with a correction to CHARMEASURE                            |
| Wildes Meadow Swamp_core1_char1 | Modified  | paleofire database | Data are from the GPD, with multiplier applied to remove it from measurement units |
| Wilson Bog_core1_char1          | Modified  | paleofire database | Data are from the GPD, with CHARMIN added                                          |
| Wingecarribee Swamp W1_char1    | Added     | digitized          | Data are from a written source                                                     |
| Wingecarribee Swamp W2_char1    | Unchanged | paleofire database | Data are from the GPD                                                              |
| Wingecarribee Swamp W2_char2    | Added     | digitized          | Data are from a written source                                                     |
| Worimi Swamp L1_char1           | Unchanged | paleofire database | Data are from the GPD                                                              |
| Worimi Swamp L2_char1           | Added     | digitized          | Data are from a written source                                                     |
| Wyelangta_core1_char1           | Unchanged | paleofire database | Data are from the GPD                                                              |
| X72/77_char1                    | Author    | author             | GPD data NOT USED for this site. Data are author-submitted                         |
| X77/50_char1                    | Author    | author             | GPD data NOT USED for this site. Data are author-submitted                         |
| X96/2_char1                     | Author    | author             | GPD data NOT USED for this site. Data are author-submitted                         |
| X96/2_char2                     | Added     | digitized          | Data are from a written source                                                     |
| X96/2_char3                     | Added     | digitized          | Data are from a written source                                                     |
| X96/2_char4                     | Added     | digitized          | Data are from a written source                                                     |
| X97/10_char1                    | Author    | author             | GPD data NOT USED for this site. Data are author-submitted                         |
| X97/22_char1                    | Author    | author             | Data are author-submitted                                                          |
| X97/22_char2                    | Modified  | paleofire database | Data are from the GPD, converted depths to metres                                  |
| Yakka Lagoon_core1_char1        | Modified  | paleofire database | Data are from the GPD, with corrections to depths                                  |

|                          |           |                    |                                                            |
|--------------------------|-----------|--------------------|------------------------------------------------------------|
| Yaouk Swamp_core1_char1  | Unchanged | paleofire database | Data are from the GPD                                      |
| Yawi Ti_core1_char1      | Unchanged | paleofire database | Data are from the GPD                                      |
| Zurath Islet_core1_char1 | Author    | author             | GPD data NOT USED for this site. Data are author-submitted |
| Zurath Islet_core1_char2 | Author    | author             | GPD data NOT USED for this site. Data are author-submitted |
| Zurath Islet_core1_char3 | Author    | author             | GPD data NOT USED for this site. Data are author-submitted |

## R Code to access SahulCHAR data from OCTOPUS via Web Feature Service (WFS) and R studio.

The below demo R script fetches, via WFS, spatial layers including rich attribute data from OCTOPUS database and generates a scatter plot and an interactive map representation, respectively.

The script requires the below packages. If not installed on your machine yet, run  
and you'll be all set up.

First we're going to load the required packages

```
library(sf) # Simple features support (sf = standardized way to encode spatial vector data)
library(httr) # Generic web-service package for working with HTTP
library(tidyverse) # Workhorse collection of R packages for data sciences
library(ows4R) # Interface for OGC web-services incl. WFS
library(viridis) # Predefined colorblind-friendly color scales for R
```

OK, we're ready to go now. In the following we store the OCTOPUS WFS URL in an object. Then, using the latter, we establish a connection to OCTOPUS database.

```
OCTOPUSdata <- "http://geoserver.octopusdata.org/geoserver/wfs" # store url in object
OCTOPUSdata_client <- WFSClient$new(OCTOPUSdata, serviceVersion = "2.0.0")
# connection to db
```

Let's see what is there, i.e. show all available layer names and titles

The above WFS request should yield the following overview

```
##                                     name
## 1                                be10-denude:crn_aus_basins
## 2                                be10-denude:crn_aus_outlets
## 3                                be10-denude:crn_int_basins
## 4                                be10-denude:crn_int_outlets
## 5                                be10-denude:crn_xxl_basins
## 6                                be10-denude:crn_xxl_outlets
## 7                                be10-denude:crn_inprep_basins
## 8                                be10-denude:crn_inprep_outlets
## 9                                be10-denude:expage
## 10 be10-denude:fossahul_webmercator_nrand_25000
## 11                                be10-denude:ippd_baseline_pollen
## 12                                be10-denude:ippd_datasets
## 13                                be10-denude:sahularch_osl
## 14                                be10-denude:sahularch_c14
## 15                                be10-denude:sahularch_tl
## 16                                be10-denude:sahulsed_aeolian_osl
## 17                                be10-denude:sahulsed_aeolian_tl
## 18                                be10-denude:sahulsed_coastal_osl
## 19                                be10-denude:sahulsed_coastal_tl
## 20                                be10-denude:sahulsed_fluvial_osl
## 21                                be10-denude:sahulsed_fluvial_tl
## 22                                be10-denude:sahulsed_lacustrine_osl
## 23                                be10-denude:sahulsed_lacustrine_tl
## 24                                be10-denude:sahulchar
## 25                                be10-denude:sahulchar_units
##                                     title
## 1                                CRN Australian collection: River basins
## 2                                CRN Australian collection: Sample sites
```

```

## 3          CRN Global collection: River basins
## 4          CRN Global collection: Sample sites
## 5          CRN Large basins: River basins
## 6          CRN Large basins: Sample sites
## 7          CRN UOW (in preparation): River basins
## 8          CRN UOW (in preparation): Sample sites
## 9          ExpAge Database
## 10         FosSahul Database
## 11         IPPD (baseline pollen)
## 12         IPPD (datasets only)
## 13         Sahul Archaeology: OSL collection
## 14         Sahul Archaeology: Radiocarbon collection
## 15         Sahul Archaeology: TL collection
## 16         Sahul Sedimentary Archives: Aeolian OSL
## 17         Sahul Sedimentary Archives: Aeolian TL
## 18         Sahul Sedimentary Archives: Coastal OSL
## 19         Sahul Sedimentary Archives: Coastal TL
## 20         Sahul Sedimentary Archives: Fluvial OSL
## 21         Sahul Sedimentary Archives: Fluvial TL
## 22         Sahul Sedimentary Archives: Lacustrine OSL
## 23         Sahul Sedimentary Archives: Lacustrine TL
## 24         Sedimentary Charcoal Records: Sahul & NZ (all data)
## 25         Sedimentary Charcoal Records: Sahul & NZ (units only)

```

That's basically it. Talking to the database via WFS takes three short lines of code.

Now we will access and save to a csv file the sites contained in the SahulCHAR database.

```

url <- parse_url(OCTOPUSdata) # parse URL into list
url$query <- list(service = "wfs",
                  version = "2.0.0",
                  request = "GetFeature",
                  typename = "be10-denude:sahulchar",
                  srsName = "EPSG:900913") # set parameters for url$query

request <- build_url(url) # build a request URL from 'url' list
CHAR_AUS <- read_sf(request) # read simple features using 'request' URL.
#Takes few secs...

csvfile <- "sahulchar.csv"

write.csv(CHAR_AUS, csvfile)

```

Now that we have the data available, we define our plot parameters. We want to plot SahulCHAR site locations.

```

library(mapview) # Provides functions for quick visualisation of spatial data
mapviewOptions(fgb = FALSE)
url2 <- parse_url(OCTOPUSdata) # parse URL into list
url2$query <- list(service = "wfs",
                  version = "2.0.0",
                  request = "GetFeature",
                  typename = "be10-denude:sahulchar_units",
                  srsName = "EPSG:900913") # set parameters for url2$query

```

```
request2 <- build_url(url2) # build a request URL from 'url' list
SahulCHAR <- read_sf(request2) # read simple features using 'request' URL.
#Takes few secs...

SahulCHAR <- st_set_crs(SahulCHAR, 900913) # Set Coordinate Reference System
SahulCHAR = st_transform(SahulCHAR, crs ="+proj=longlat +datum=WGS84")
# Transform geometry to geographic coordinates, WGS84

#View sites coloured by basal age of site
mapview(SahulCHAR, xcol = "X_WGS84", ycol = "Y_WGS84",
        zcol = "MAXAGE", at = seq(0, 100000, 10000), alpha = .25,
        # set range (0 to 100000) and bins (10 ka)
        alpha.regions = 0.1, legend = TRUE)

# Display on map using "mapview" package
```

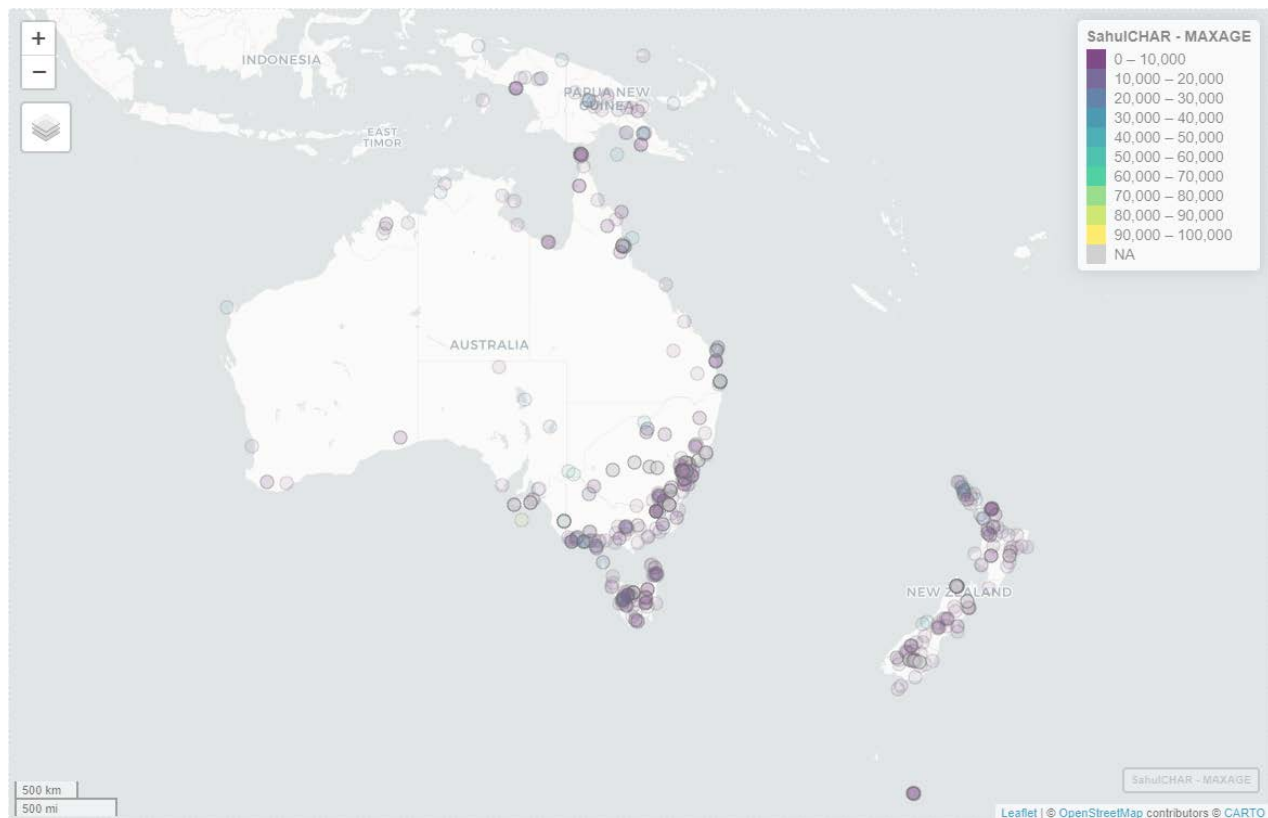

Supplement: Supplementary file 1 [file essd-17-2681-2025-supplement.pdf]
